# Supplementary material for: Large-scale graphene production by RF-cCVD method
Source: Royal Society of Chemistry journal article supplement (doi:10.1039/b906323d), 2009-01-01
Supplement: b906323d.pdf [file b906323d.pdf]

## Supplementary Information

### Large Scale Graphene Production by RF-cCVD Method

**Enkeleda Dervishi,<sup>\*a,b</sup> Zhongrui Li,<sup>b</sup> Fumiya Watanabe,<sup>b</sup> Abhijit Biswas,<sup>c</sup>  
Yang Xu,<sup>b</sup> Alexandru R. Biris,<sup>d</sup> Viney Saini,<sup>a,b</sup> and Alexandru S. Biris<sup>\*a,b</sup>**

<sup>a</sup>*Applied Science Department, University of Arkansas at Little Rock, 2801 S. University Ave., Little Rock, AR 72204*

<sup>b</sup>*Nanotechnology Center, University of Arkansas at Little Rock, 2801 S. University Ave., Little Rock, AR 72204*

<sup>c</sup>*Department of Physics and Astronomy, University of Oklahoma, 440 West Brooks Street Norman, OK 73019*

<sup>d</sup>*National Institute for Research and Development of Isotopic and Molecular Technologies, P.O. Box 700, R-400293 Cluj-Napoca, Romania*

*\*Corresponding Authors*

#### Experimental Details

The Fe-Co/MgO catalyst system with a stoichiometric composition of 2.5:2.5:95 wt.%, was prepared by the impregnation method. First, the weighted amount of metal salts,  $\text{Fe}(\text{NO}_3)_3 \cdot 9\text{H}_2\text{O}$  and  $\text{Co}(\text{NO}_3)_2 \cdot 6\text{H}_2\text{O}$ , were dissolved separately in ethanol with agitation. Next, MgO with a surface area of  $130 \text{ m}^2/\text{g}$  was completely dispersed into 30 ml of ethanol and the metal salt mixtures were added to this MgO solution. The final

mixture was sonicated for approximately 1 hour. Next, the ethanol was evaporated under continuous agitation, and the catalyst system was further dried overnight at 60 °C.

Finally, the catalyst was calcinated in air at 500 °C for 2 hours.

Few-layer graphene sheets were grown by Radio Frequency (RF) catalytic Chemical Vapor Deposition (cCVD) on the MgO supported Fe-Co bi-metallic catalyst system utilizing acetylene as a hydrocarbon source. Approximately 100 mg of the catalyst was uniformly spread into a thin layer on a graphite susceptor and placed in the center of a quartz tube with inner diameter of 1 inch. First, the tube was purged with the carrier gas (Argon) for 10 minutes at 150 ml/min. Next, the RF generator (which provides a very fast heating rate of 300-350 °C/min) was turned on to begin heating. When the temperature of the graphite boat reached 1000 °C, acetylene was introduced at 4.5 ml/min for 30 minutes. At the end of the reaction, the system cooled down under the presence of Argon for 10 minutes. The as-produced graphene sheets were purified in one easy step using diluted hydrochloric acid solution and sonication.

## **Characterization Techniques**

Transmission Electron Microscopy (TEM) images were collected on a field emission JEM-2100F TEM (JEOL Inc.) equipped with a CCD camera. The acceleration voltage was 100 kV for the graphene analysis. The graphene nanosheets were homogeneously dispersed in 2-propanol under ultra-sonication for 30 minutes. Next, a few drops of the suspension were deposited on the TEM grid, dried, and evacuated before analysis.

The STM in this study was a homebuilt beetle-style STM with RHK technology SPM1000 controller and XMP software with Axon CV4 current amplifier. STM imaging was performed in dry N<sub>2</sub> at room temperature. A drop of graphene solution (flakes of graphene dispersed in iso-propanol) was deposited on the Au/mica substrate, which was then allowed to dry in air.

Atomic Force Microscopy (AFM) measurements were performed using a Veeco Dimension 3100 instrument. This instrument has a scan range of 90 μm for the “x/y” direction and 6 μm for the “z” direction, respectively. After the graphene sheets were individually dispersed into 2-propanol solution, a few drops of the final solution were pipetted on Si substrates. Next, the substrates were air dried and placed directly under the AFM tip for morphology analysis.

Brunauer-Emmett-Teller (BET) and Langmuir surface area analyses were determined by recording nitrogen adsorption/desorption isotherms at 77 K using a static volumetric technique with a Micromeritics ASAP 2020 instrument. Before the physisorption measurements, the graphene sample was degassed at 623 K for 4 h under vacuum.

Raman scattering spectra were recorded at room temperature using Horiba Jobin Yvon LabRam HR800 equipped with a CCD. A spectrometer with a grating of 600 lines/mm and a He-Ne laser (633 nm) was used as an excitation source. The laser beam intensity measured at the sample was kept at 5 mW and Raman shifts were calibrated with a silicon wafer at a peak of 521 cm<sup>-1</sup>.

The X-ray powder diffraction profiles of the graphene sheets were recorded in the  $\theta$ -2 $\theta$  mode on the Bruker D8 Discovery diffraction system system (Bruker AXS

Corporation). The monochromatic Cu  $K\alpha$  radiation line and general area detector diffraction system were used as an excitation source and detector, respectively. The experiments were carried out in Bragg-Brentano geometry. Quantitative analysis was performed with whole pattern fitting and Rietveld refinement.

## Atomic Force Microscopy

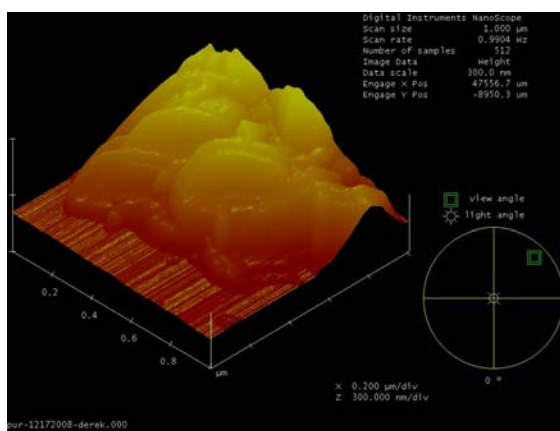

Figure S1. 3-D representation of a  $1\ \mu\text{m} \times 1\ \mu\text{m}$  AFM scan of graphene sheets overlaid on the Si surface.

## X-ray Diffraction Analysis

The number of graphene layers was calculated by using the value of the d-spacing and the size of the crystallite. Bragg's law was used to estimate the value of the d-spacing as shown by the following formula:

$$n\lambda = 2d \cdot \sin \theta$$

where  $\lambda$  is the wavelength of incident x-rays (in this case  $1.54\ \text{\AA}$ ) and  $\theta$  is the scattering angle of the C(002) peak.

The crystallite size was estimated from the diffraction peak widths using the Scherrer equation:

$$\beta_{hkl} = \frac{K\lambda}{L_{hkl} \cos \theta_{hkl}}$$

where  $\beta$  is the width of the peak at half maximum intensity of a specific phase ( $hkl$ ) in radians,  $K$  is a constant and in this case is taken equal to 0.9,  $\lambda$  is the wavelength of incident x-rays,  $\theta$  is the center angle of the peak and  $L$  is the crystallite length.
